# Supplementary material
Source: MDPI journal article supplement (https://www.mdpi.com/2073-4336/10/3/28)
Supplement: s1 [file s1]

Welcome and thank you very much for participating!

Today you are taking part in an economic experiment. Please note that you can earn real money (more than €100) in this experiment and that the amount of money depends on your decisions in the experiment. At the end of the experiment, three participants will be randomly selected, who will actually be paid out. For the payment, we can only consider questionnaires, which are completely filled out. Every participant of the experiment has the same chance to be randomly selected. Your personal decisions in the experiment have no influence on who is selected at the end. Those who are not selected will receive a small gift for the start of the semester as a thank-you. Details on the payment can be found on the yellow card with your identification number.

We will now explain some general rules. Please follow these rules at all stages of the experiment. From now on, please no longer communicate with the other participants. This is to ensure that you make your decisions individually within the experiment and that your decisions cannot be observed by others. In addition, please always follow our instructions.

You may stop the experiment at any time and leave the auditorium. Please note, however, that we will not be able to pay you in this case. If you feel uncomfortable or already know that you will not be able to stay here for the next 30 min, please inform one of our team members.

This experiment is part of a study on the donation behavior of students. The whole experiment will require a maximum of 30 min of your time. During this time you will fill out various questionnaires. It is essential that you enter your personal identification number, which you received from us at the beginning, at the top of each page. Please note that there are no correct or incorrect answers to the questions we will ask you. Please always answer truthfully and according to your personal opinion. Please also note that the data collected in this experiment will be treated confidentially and will not be passed on to third parties.

At the beginning we would like to ask you some questions:

- [illegible]

- [illegible]

- [illegible]

- | <input type="radio"/> |                                       |
|-----------------------|-----------------------|-----------------------|-----------------------|-----------------------|---------------------------------------|
| Never                 | Rarely                | Sometimes             | Often                 | Always                | I don't know / I don't want to answer |
| <input type="radio"/>                 |

- |       |        |           |       |        |                                       |
|-------|--------|-----------|-------|--------|---------------------------------------|
| Never | Rarely | Sometimes | Often | Always | I don't know / I don't want to answer |
|-------|--------|-----------|-------|--------|---------------------------------------|

6. How important is privacy to you in general?

| Unimportant              | Rather unimportant       | Important                | Very important           | Extremely important      | I don't know / I don't want to answer |
|--------------------------|--------------------------|--------------------------|--------------------------|--------------------------|---------------------------------------|
| <input type="checkbox"/>              |

7. How important is the security of your personal data to you?

| Unimportant              | Rather unimportant       | Important                | Very important           | Extremely important      | I don't know / I don't want to answer |
|--------------------------|--------------------------|--------------------------|--------------------------|--------------------------|---------------------------------------|
| <input type="checkbox"/>              |

### Personal Details

In this part of the experiment, we ask you three questions. Simply choose the answer that best suits you.

1. Would you like to lose weight?

☐ yes ☐ no

2. Do you smoke?

☐ yes ☐ no

3. What was the average grade of your last school degree (e.g., Abitur)? \_\_\_\_\_

### Donate-Or-Take-Decisions

In this part of the experiment, you can make a decision about the distribution of an amount of money between yourself and one of three organizations. You start with €150. Every organization starts with €50. For each of the three organizations, you can decide whether you donate between €0 and €50 to them or whether you take between €0 and €50 away from them.

The three organizations are the "KSV Hessen Kassel" (a local soccer club), the "ILGA" (International Lesbian, Gay, Bisexual, Trans and Intersex Association) and the "UNHCR" (UN Refugee Agency).

At the end of the experiment, three participants are randomly selected. For each of these participants, we then randomly select an organization where the decisions of the particular participant will be implemented. Each organization is assigned to exactly one of the three randomly selected participants of the experiment.

#### Short summary:

Your endowment is €150.

The endowment of each organization is €50.

You can now make one of the following decisions for each organization:

You donate an amount between €0 and €50 to the organization.

**Or**

You take an amount between €0 and €50 from the endowment of the organization. By this amount, your payment increases, and the donation amount of the organization decreases accordingly.

### Now please make a decision for each of the three organizations:

(Reminder: The decision will only be implemented if you and the organization affected are randomly selected.)

In case that the organization "KSV Hessen Kassel" (local soccer club) is randomly selected, I would like to .....

☐ take ☐ donate ☐ neither take nor donate money.

What amount would you like to donate or take (between €0 and €50)?

€ \_\_\_\_\_

If the organization "ILGA" (International Lesbian, Gay, Bisexual, Trans and Intersex Association) is randomly selected, I would like to .....

☐ take            ☐ donate            ☐ neither take nor donate            money.

What amount would you like to donate or take (between €0 and €50)?

€ \_\_\_\_\_

In case that the organization "UNHCR" (UN Refugee Agency) is randomly selected, I would like to .....

☐ take            ☐ donate            ☐ neither take nor donate            money.

What amount would you like to donate or take (between €0 and €50)?

€ \_\_\_\_\_

After all the participants have completed this part of the experiment, we collect all questionnaires. Afterwards, the second part of the experiment begins. Please remain quietly seated at your place.

## **Second Part**

In this part of the experiment, you can increase your payment amount. You can allow us to disclose information about you in return for payment, but you do not have to do so.

First of all, we will make you an offer in which, in the event of an implementation, your "Personal details" from the orange sheet (wish to lose weight, smoking, school grade) will be read out publicly, and you will have to stand up during the reading so that all participants can see you.

### **The offer is structured as follows:**

Below you can enter the price at which you are willing to give us the right to read out publicly your "Personal details" if you are randomly selected and your decisions become relevant to your payment and that of the organization.

Before the experiment, six prizes were written down by the experimenters and placed in separate envelopes. These prizes are in the range of €0 to €100. At the end of the experiment, two envelopes are randomly selected. If the price in the first envelope is lower than the price you specify below, your "personal details" will not be publicly read, and you will not receive any additional payment.

If the price in the first envelope is higher than the price you specify, you will receive the price from the envelope in addition to your existing payment. Your "personal details" will be read out publicly, and you will have to stand up during the reading so that all participants can see you.

### **Public Reading of "Personal Details" (Wish to Lose Weight, Smoking, School Grade)**

Please tell us the price at which you are willing to give us the right to read out publicly your "Personal details" while you are standing.

(In no case will we pay you more than €100 for this right. If you enter more than €100, your "Personal details" will not be read out publicly under any circumstances.)

Minimum price at which my "Personal details" can be read out publicly while I stand up for this:

€ \_\_\_\_\_

In addition, we make you an offer in which, in case of an implementation, your "Donate-or-take-decisions" from the orange sheet are read out publicly, and you have to stand up during the reading so that all participants can see you.

### **The offer is structured as follows:**

Below you can enter the price at which you are willing to give us the right to read out publicly your "Donate-or-take-decisions" if you are randomly selected and your decisions become relevant to your payment and that of the organization.

Before the experiment, six prizes were written down by the experimenters and placed in separate envelopes. These prices are in the range of €0 to €100. At the end of the experiment, two envelopes are randomly selected. If the price in the first envelope is lower than the price you specify below, your “Donate-or-take-decisions” will not be publicly read, and you will not receive any additional payment.

If the price in the first envelope is higher than the price you specify, you will receive the price from the envelope in addition to your existing payment. Your “Donate-or-take-decisions” will be read out publicly, and you will have to stand up during the reading so that all participants can see you.

### **Public Reading of “Donate-Or-Take-Decisions”**

Please tell us the price at which you are willing to give us the right to read out publicly your “Donate-or-take-decisions” while you are standing.

(In no case we will pay you more than €100 for this right. If you enter more than €100, your “Donate-or-take-decisions” will not be read out publicly under any circumstances.)

Minimum price at which my “Donate-or-take-decisions” can be read out publicly while I stand up for this:

€ \_\_\_\_\_

*Please go to the next page for some final questions.*

We would be grateful if you could (voluntarily) answer the following question: What were the reasons for your decisions on the two previous pages?

At this point, you can give us general feedback on the experiment:

Demographic data

Your gender:            ☐ male                      ☐ female                      ☐ other / no specification

Your age: \_\_\_\_\_

Thank you very much for participating!
